# **COVID-19 Pandemic in University Hospital:**

## **Is There an Effect on The Medical Interns?**

WeiHonn Lim<sup>1¶\*</sup>; Li Ying Teoh<sup>1¶</sup>; Kanesh Kumaran A/L Seevalingam<sup>1¶</sup>; Shanggar  
Kuppusamy<sup>1¶</sup>

<sup>1</sup> Department of Surgery, University of Malaya Medical Centre, Kuala Lumpur, Malaysia

<sup>¶</sup> Current address: Department of Surgery, University of Malaya Medical Centre, Kuala  
Lumpur, Malaysia

\* Corresponding Author: WeiHonn Lim

Email Address : weihonn88@hotmail.com/ weihonn88@gmail.com

Abbreviations

COVID-19, Coronavirus Disease 2019; HCW, healthcare workers; UMMC, University  
Malaya Medical Centre; OR, Odd Ratio

20 **Abstract**

21 **Introduction**

22 Coronavirus Disease 2019 (COVID-19) pandemic has disrupted the current healthcare system  
23 and carries a major impact to the healthcare workers (HCW). University Malaya Medical  
24 Centre (UMMC) has been selected as one of the centres in managing COVID-19 cases in  
25 Malaysia. Many HCW including the medical interns, are directly or indirectly involved in the  
26 management.

27 **Methods**

28 This is a cross-sectional, pilot study to determine the impact of the pandemic on UMMC  
29 medical interns. A survey which comprises 37-items was used. Data are analysed by Ordinal  
30 Logistic Regression Analysis.

31 **Results**

32 Our study shows that medical interns are tired ( $p = 0.014$ ), starving ( $p = 0.004$ ), have  
33 inadequate exercises ( $p = 0.004$ ) and burdened with heavy workload ( $p=0.023$ ) during  
34 pandemic period. Many are depressed ( $p = 0.043$ ), scared to work ( $p = 0.03$ ), and worried of  
35 getting infected ( $p < 0.05$ ). Some quarrel with their colleagues ( $p < 0.05$ ), losing contact with  
36 friends ( $p = 0.022$ ) and feel that it will be beneficial to have a peer support group ( $p = 0.027$ ).

37 **Conclusion**

38 In summary, the impact of COVID-19 amongst medical interns is significant and their overall  
39 well-being should be protected without jeopardising their training.

40

## 41 **Introduction**

42           Since the outbreak of COVID-19, this novel virus has invaded many countries and  
43 exerts a great impact in the current healthcare system.[1, 2] Limited medical resources  
44 against an unpredictable disease burden the health system capacity.[3, 4] Furthermore, many  
45 HCW have been exhausted from an overwhelming workload globally. Malaysia experiences  
46 a similar fate starting from March 2020. In response to this pandemic crisis, Malaysia has  
47 implemented Movement Control Order (MCO) from 18th March 2020 in several stages, and  
48 currently we are in the Recovery Period of MCO.[5]

49           The medical interns, also named as the House Officers (HO) in Malaysia, comprise of  
50 medical graduates who will require two years of medical training. During this period of  
51 training, they rotate to six compulsory clinical postings such as Internal Medicine, Surgery,  
52 Obstetrics and Gynaecology, Orthopaedic and Paediatric departments. Addition to that is a  
53 choice of a posting in either Psychiatry, Emergency Medicine or Anaesthesiology department.  
54 [6] They are required to complete at least 4 months rotation in each department with a certain  
55 expectation in their clinical exposure to fulfil, under full supervision by their specialists and  
56 consultants. These two years of training are tough and medical interns must withstand a great  
57 level of work stress while trying to gain more clinical experiences during the posting in each  
58 department.

59           As a teaching university hospital in Malaysia, UMMC has been gazetted as one of the  
60 designated COVID centres. To fulfil its role, many changes have been adapted to  
61 accommodate the surge of COVID cases: from rescheduling clinic appointments and elective  
62 operations to deployment of more HCW to Emergency Department as “frontliners” and  
63 gazetted more designated COVID wards to manage infected cases. [7, 8]

64 For medical interns to work during pandemic periods, there are few challenges  
65 encountered: a sudden rise in workload which strains their physical fitness; fear of  
66 contracting COVID-19 and worrying of unable to complete their medical training on-time  
67 exerts an immense pressure to their psychology; conflict between colleagues due to sudden  
68 change of workload and losing contact with their friends, families and loved ones during this  
69 COVID-19 season affects them indirectly. [4, 8-11] Additionally, they are required to  
70 complete their tasks with high expectation from their supervisors as they are expected to  
71 perform above par in order to become a safe doctor in the community. To protect oneself  
72 from this contagious disease, they must heighten their vigilance during their works. All these  
73 invisible hurdles not only affect their mental states but their performances. Nevertheless, the  
74 degree of impact from this pandemic on the medical interns needs to be addressed to ensure  
75 their well-beings are protected.

76

## 77 **Methods**

78 A survey form is created and drafted in English language which composed of two  
79 components: demographic status (gender, ethnics, age, number of posting and qualification  
80 attained) and the questionnaire itself which comprises of five domains: physical health,  
81 emotion/ psychological coping, social/ relationship handling, medical training progression  
82 and preparedness in handling a pandemic situation. The questionnaire uses a five-response  
83 Likert Scale: ranging from 1 to 5 which represent totally disagree, disagree, neutral, agree  
84 and strongly agree respectively.

85 The questionnaire is uploaded to an online survey form - Google Form and a link is  
86 generated. The invitation for participation in the study is sent by email and electronic devices

87 via WhatsApp, with the link to assess the questionnaire. Electronic Participant Information  
88 Sheets (PIS) are provided in the first page of the survey form. All participations are self-  
89 voluntary whereby they can choose not to participate if they have disagreed to include their  
90 responses in this study result. The questionnaire is self-administered by the participants in  
91 anonymity. Participation is opened from April 2020 to June 2020.

92 Subsequently, all data are downloaded into Excel form and transcript into SPSS  
93 Version 16.0. Demographic data are summarised by descriptive analysis. Association  
94 between demographic factors and each item in the questionnaire is analysed by using Ordinal  
95 Logistic Regression Analysis. Subsequently, data are analysed using Generalised Linear  
96 Models where demographic data were entered as the factor and all items in the questionnaire  
97 were keyed in as dependent variables. For each factor, groups with majority numbers are  
98 made as comparators to avoid potential bias: Female, Malay ethnic and local graduates are  
99 listed as comparators to others in their respective groups.

100

## 101 **Results**

102 There are total of 236 responses recorded in our Google Form. Out of these numbers, 232  
103 participants consented to join which contributes 98.3% of response rate while only four of  
104 them declined to participate. Of 232 participants who agreed to participate in this survey,  
105 majority are females (62.1%) and of Malay ethnics (45.3%). Most of them attained their  
106 medical degrees from local university (60.8%) and had completed at least 3 postings (56.9%).

107

108

109 **Table 1: Basic Demographic Data of Medical Interns**

| <i>Variables</i>                     | <i>Male<br/>(n = 88)</i> | <i>Female<br/>(n = 144)</i> | <i>Total<br/>(n = 232)</i> |
|--------------------------------------|--------------------------|-----------------------------|----------------------------|
| <b>Age, years (SD)</b>               | <b>27 (1.38)</b>         | <b>27 (1.74)</b>            | <b>27 (1.6)</b>            |
| <b>Ethnics, n (%)</b>                |                          |                             |                            |
| Malay                                | 33 (14.2)                | 72 (31.0)                   | 105 (45.3)                 |
| Chinese                              | 35 (15.1)                | 43 (18.5)                   | 78 (33.6)                  |
| Indian                               | 17 (7.3)                 | 24 (10.3)                   | 41 (17.7)                  |
| Others                               | 3 (1.3)                  | 5 (2.2)                     | 8 (3.4)                    |
| <b>Qualification Attained, n (%)</b> |                          |                             |                            |
| Local University                     | 56 (24.1)                | 85 (36.6)                   | 141 (60.8)                 |
| Overseas University                  | 18 (7.8)                 | 44 (19.0)                   | 62 (26.7)                  |
| Twinning Programmes                  | 14 (6.0)                 | 15 (6.5)                    | 29 (12.5)                  |
| <b>Number of Posting, n (%)</b>      |                          |                             |                            |
| 1                                    | 13 (5.6)                 | 14 (6.0)                    | 27 (11.6)                  |
| 2                                    | 14 (6.0)                 | 25 (10.8)                   | 39 (16.8)                  |
| 3                                    | 24 (10.3)                | 42 (18.1)                   | 66 (28.4)                  |
| 4                                    | 20 (8.6)                 | 36 (15.5)                   | 56 (24.1)                  |
| 5                                    | 6 (2.6)                  | 11 (4.7)                    | 17 (7.3)                   |
| 6                                    | 11 (4.7)                 | 16 (6.9)                    | 27 (11.6)                  |

**Table 2: Association between Demographic Factors with Physical Health**

| Questions                    | Gender            |                                     | Ethnic                  |                                     | Location of Qualification |                                     | Number of Posting      |                                     |
|------------------------------|-------------------|-------------------------------------|-------------------------|-------------------------------------|---------------------------|-------------------------------------|------------------------|-------------------------------------|
|                              | Estimates<br>(OR) | p-value<br>(Confidence<br>Interval) | Estimates<br>(OR)       | p-value<br>(Confidence<br>Interval) | Estimates<br>(OR)         | p-value<br>(Confidence<br>Interval) | Estimates<br>(OR)      | p-value<br>(Confidence<br>Interval) |
| I am physically worn<br>out  | -0.298<br>(0.743) | 0.240<br>(0.452-1.22)               | E1 = 0.210<br>(1.233)   | 0.757<br>(0.327- 4.646)             | G1 = -0.181<br>(0.835)    | 0.629<br>(0.401- 1.739)             | P1 = 0.893<br>(2.441)  | 0.082<br>(0.892- 6.682)             |
|                              |                   |                                     | E2= - 0.532<br>(0.587)  | 0.104<br>(0.309-1.115)              | G2 = 0.083<br>(1.087)     | 0.764<br>(0.631- 1.871)             | P2 = 0.237<br>(1.268)  | 0.611<br>(0.509- 3.161)             |
|                              |                   |                                     | E3= - 0.440<br>(0.552)  | 0.876<br>(0.552-1.660)              |                           |                                     | P3 = 0.142<br>(1.152)  | 0.736<br>(0.505- 2.631)             |
|                              |                   |                                     |                         |                                     |                           |                                     | P4 = 0.434<br>(1.544)  | 0.317<br>(0.659- 3.613)             |
|                              |                   |                                     |                         |                                     |                           |                                     | P5 = -0.151<br>(0.860) | 0.793<br>(0.279- 2.653)             |
| I have enough rest/<br>sleep | -0.350<br>(0.704) | 0.165<br>(0.430-1.155)              | E1= - 0.408<br>(0.665)  | 0.529<br>(0.186- 2.369)             | G1 = 1.054<br>(2.868)     | 0.010<br>(1.287-6.392)              | P1 = -1.280<br>(0.278) | 0.014<br>(0.100- 0.774)             |
|                              |                   |                                     | E2 = - 0.564<br>(0.569) | 0.088<br>(0.298-1.087)              | G2 = 0.245<br>(1.277)     | 0.387<br>(0.734-2.224)              | P2 = -1.044<br>(0.352) | 0.032<br>(0.136-0.912)              |

|                                         |                   |                         |                        |                         |                        |                         |                        |                         |
|-----------------------------------------|-------------------|-------------------------|------------------------|-------------------------|------------------------|-------------------------|------------------------|-------------------------|
|                                         |                   |                         | E3 = -0.562<br>(0.570) | 0.048<br>(0.326- 0.996) |                        |                         | P3 = -0.206<br>(0.814) | 0.639<br>(0.345-1.924)  |
|                                         |                   |                         |                        |                         |                        |                         | P4 = -0.482<br>(0.617) | 0.284<br>(0.256-1.492)  |
|                                         |                   |                         |                        |                         |                        |                         | P5 = 0.189<br>(1.209)  | 0.757<br>(0.365-4.004)  |
| I am starving all the time              | 0.076<br>(1.079)  | 0.759<br>(0.662-1.760)  | E1 = 0.542<br>(1.720)  | 0.410<br>(0.473- 6.256) | G1 = -0.697<br>(0.498) | 0.056<br>(0.244- 1.019) | P1 = 1.539<br>(4.658)  | 0.003<br>(1.686-12.872) |
|                                         |                   |                         | E2 = -0.309<br>(0.734) | 0.367<br>(0.375- 1.438) | G2 = -0.057<br>(0.945) | 0.844<br>(0.538- 1.661) | P2 = 1.385<br>(3.995)  | 0.004<br>(1.553-10.279) |
|                                         |                   |                         | E3 = 0.269<br>(1.309)  | 0.326<br>(0.765-2.240)  |                        |                         | P3 = 1.104<br>(3.015)  | 0.012<br>(1.278-7.115)  |
|                                         |                   |                         |                        |                         |                        |                         | P4 = 0.855<br>(2.351)  | 0.055<br>(0.982-5.630)  |
|                                         |                   |                         |                        |                         |                        |                         | P5 = -0.187<br>(0.829) | 0.741<br>(0.273-2.519)  |
| I can get plenty of exercise after duty | -0.512<br>(0.599) | 0.037<br>(0.370- 0.970) | E1 = -0.215<br>(0.806) | 0.760<br>(0.203- 0.203) | G1 = 0.952<br>(2.592)  | 0.017<br>(1.187-5.662)  | P1 = 0.012<br>(1.012)  | 0.981<br>(0.377-2.717)  |
|                                         |                   |                         | E2 = -0.18             | 0.584                   | G2 = 0.295             | 0.279                   | P2 = 0.406             | 0.373                   |



|                                        |                  |                         |                        |                         |                        |                        |                       |                        |
|----------------------------------------|------------------|-------------------------|------------------------|-------------------------|------------------------|------------------------|-----------------------|------------------------|
|                                        |                  |                         | (0.835)                | (0.438-1.592)           | (1.343)                | (0.787- 2.290)         | (1.501)               | (0.614-3.665)          |
|                                        |                  |                         | E3 = -0.499<br>(0.607) | 0.069<br>(0.355- 1.039) |                        |                        | P3 = 1.196<br>(3.307) | 0.004<br>(1.459-7.494) |
|                                        |                  |                         |                        |                         |                        |                        | P4 = 1.137<br>(3.117) | 0.009<br>(1.333-7.292) |
|                                        |                  |                         |                        |                         |                        |                        | P5 = 0.908<br>(2.479) | 0.133<br>(0.758-8.107) |
| I have more<br>workload than<br>before | 0.091<br>(1.095) | 0.722<br>(0.665- 1.804) | E1= 0.772<br>(2.165)   | 0.230<br>(0.614-7.634)  | G1 = -0.584<br>(0.558) | 0.121<br>(0.266-1.167) | P1 = 1.217<br>(3.377) | 0.023<br>(1.182-9.648) |
|                                        |                  |                         | E2 =0.056<br>(1.057)   | 0.866<br>(0.553-2.021)  | G2 = -0.328<br>(0.720) | 0.253<br>(0.410-1.264) | P2 = 0.886<br>(2.425) | 0.060<br>(0.964-6.098) |
|                                        |                  |                         | E3 =0.029<br>(1.030)   | 0.916<br>(0.595-1.783)  |                        |                        | P3 = 0.649<br>(1.913) | 0.127<br>(0.832-4.400) |
|                                        |                  |                         |                        |                         |                        |                        | P4 = 0.884<br>(2.420) | 0.047<br>(1.013-5.781) |
|                                        |                  |                         |                        |                         |                        |                        | P5 = 0.373<br>(1.452) | 0.536<br>(0.445-4.740) |

112

113 \*E1 = other ethnics; E2 = Indian; E3 = Chinese; G1 = twining program; G2 = overseas; P1= 1<sup>st</sup> posting; P2 = 2<sup>nd</sup> posting; P3= 3<sup>rd</sup> posting; P4 = 4<sup>th</sup> posting; P5 = 5<sup>th</sup> posting

114

**Table 3: Association between Demographic Factors with Emotion/ Psychological Coping**

| Questions                              | Gender            |                                     | Ethnic                 |                                     | Location of Qualification |                                     | Number of Posting      |                                     |
|----------------------------------------|-------------------|-------------------------------------|------------------------|-------------------------------------|---------------------------|-------------------------------------|------------------------|-------------------------------------|
|                                        | Estimates<br>(OR) | p-value<br>(Confidence<br>Interval) | Estimates<br>(OR)      | p-value<br>(Confidence<br>Interval) | Estimates<br>(OR)         | p-value<br>(Confidence<br>Interval) | Estimates<br>(OR)      | p-value<br>(Confidence<br>Interval) |
| I feel demotivated to<br>work everyday | -0.465<br>(0.628) | 0.069<br>(0.381-1.037)              | E1 = -0.395<br>(0.674) | 0.543<br>(0.189-2.400)              | G1 = -0.238<br>(0.788)    | 0.530<br>(0.375-1.655)              | P1 = 0.606<br>(1.832)  | 0.234<br>(0.677-4.963)              |
|                                        |                   |                                     | E2 = -0.602<br>(0.548) | 0.072<br>(0.284-1.056)              | G2 = 0.125<br>(1.133)     | 0.652<br>(0.659-1.947)              | P2 = 0.217<br>(1.243)  | 0.629<br>(0.514-3.003)              |
|                                        |                   |                                     | E3 = -0.338<br>(0.713) | 0.226<br>(0.412-1.233)              |                           |                                     | P3 = -0.048<br>(0.953) | 0.909<br>(0.419-2.170)              |
|                                        |                   |                                     |                        |                                     |                           |                                     | P4 = -0.158<br>(0.853) | 0.714<br>(0.366-1.990)              |
|                                        |                   |                                     |                        |                                     |                           |                                     | P5 = 0.210<br>(1.233)  | 0.725<br>(0.383-3.974)              |
| I am scared to go to<br>work every day | -0.110<br>(0.896) | 0.663<br>(0.546-1.469)              | E1 = -0.751<br>(0.472) | 0.256<br>(0.129-1.727)              | G1 = 0.124<br>(1.132)     | 0.746<br>(0.533-2.405)              | P1 = 0.990<br>(2.691)  | 0.052<br>(0.992-7.302)              |
|                                        |                   |                                     | E2 = -0.648<br>(0.523) | 0.051<br>(0.272-1.004)              | G2 = 0.381<br>(1.464)     | 0.173<br>(0.846-2.535)              | P2 = 0.305<br>(1.356)  | 0.501<br>(0.558-3.296)              |

|                                                                  |                   |                        |                        |                        |                        |                        |                        |                        |
|------------------------------------------------------------------|-------------------|------------------------|------------------------|------------------------|------------------------|------------------------|------------------------|------------------------|
|                                                                  |                   |                        | E3 = -0.605<br>(0.546) | 0.030<br>(0.316-0.944) |                        |                        | P3 = 0.125<br>(1.133)  | 0.766<br>(0.498-2.575) |
|                                                                  |                   |                        |                        |                        |                        |                        | P4 = 0.320<br>(1.377)  | 0.458<br>(0.592-3.206) |
|                                                                  |                   |                        |                        |                        |                        |                        | P5 = -0.486<br>(0.615) | 0.418<br>(0.190-1.994) |
| I think I am being<br>paranoid                                   | -0.354<br>(0.702) | 0.159<br>(0.428-1.149) | E1 = -0.379<br>(0.685) | 0.526<br>(0.212-2.208) | G1 = -0.378<br>(0.685) | 0.314<br>(0.328-1.431) | P1 = 0.617<br>(1.853)  | 0.232<br>(0.674-5.094) |
|                                                                  |                   |                        | E2 = -0.211<br>(0.810) | 0.523<br>(0.424-1.547) | G2 = -0.079<br>(0.924) | 0.779<br>(0.532-1.606) | P2 = 0.646<br>(1.907)  | 0.166<br>(0.765-4.757) |
|                                                                  |                   |                        | E3 = -0.300<br>(0.741) | 0.281<br>(0.430-1.278) |                        |                        | P3 = 0.353<br>(1.424)  | 0.415<br>(0.609-3.332) |
|                                                                  |                   |                        |                        |                        |                        |                        | P4 = 0.811<br>(2.251)  | 0.075<br>(0.922-5.497) |
|                                                                  |                   |                        |                        |                        |                        |                        | P5 = 0.037<br>(1.037)  | 0.951<br>(0.319-3.374) |
| If given a chance to<br>turn back time, I<br>would not choose to | -0.534<br>(0.586) | 0.032<br>(0.359-0.956) | E1 = -0.207<br>(0.813) | 0.740<br>(0.239-2.766) | G1 = -0.387<br>(0.679) | 0.262<br>(0.345-1.335) | P1 = 0.840<br>(1.981)  | 0.155<br>(0.772-5.081) |
|                                                                  |                   |                        | E2 = -0.299            | 0.369                  | G2 = 0.156             | 0.568                  | P2 = 0.631             | 0.168                  |

|                                                    |                   |                        |                        |                        |                        |                        |                        |                        |
|----------------------------------------------------|-------------------|------------------------|------------------------|------------------------|------------------------|------------------------|------------------------|------------------------|
| be a doctor                                        |                   |                        | (0.742)                | (0.387-1.422)          | (1.169)                | (0.684-1.998)          | (1.879)                | (0.767-4.605)          |
|                                                    |                   |                        | E3 = -0.390<br>(0.677) | 0.148<br>(0.399-1.148) |                        |                        | P3 = 0.057<br>(1.058)  | 0.887<br>(0.483-2.318) |
|                                                    |                   |                        |                        |                        |                        |                        | P4 = 0.090<br>(1.095)  | 0.828<br>(0.485-2.472) |
|                                                    |                   |                        |                        |                        |                        |                        | P5 = -0.008<br>(0.992) | 0.988<br>(0.342-2.874) |
| I feel depressed<br>working in a COVID<br>hospital | -0.454<br>(0.635) | 0.078<br>(0.384-1.052) | E1 = -0.570<br>(0.565) | 0.382<br>(0.158-2.030) | G1 = -0.519<br>(0.595) | 0.159<br>(0.289-1.225) | P1 = 0.800<br>(2.225)  | 0.121<br>(0.810-6.109) |
|                                                    |                   |                        | E2 = -0.553<br>(0.575) | 0.106<br>(0.294-1.125) | G2 = 0.257<br>(1.293)  | 0.372<br>(0.735-2.273) | P2 = 0.963<br>(2.619)  | 0.043<br>(1.029-6.668) |
|                                                    |                   |                        | E3 = -0.384<br>(0.681) | 0.171<br>(0.393-1.181) |                        |                        | P3 = 0.063<br>(1.065)  | 0.885<br>(0.453-2.506) |
|                                                    |                   |                        |                        |                        |                        |                        | P4 = 0.244<br>(1.277)  | 0.587<br>(0.529-3.078) |
|                                                    |                   |                        |                        |                        |                        |                        | P5 = -0.129<br>(0.879) | 0.832<br>(0.266-2.905) |
| I am worried I might<br>get infected with          | 0.088<br>(1.092)  | 0.718<br>(0.677-1.763) | E1 = -1.527<br>(0.217) | 0.017<br>(0.062-0.763) | G1 = 0.277<br>(1.319)  | 0.444<br>(0.649-2.683) | P1 = -0.395<br>(0.674) | 0.422<br>(0.257-1.766) |

|       |  |  |                        |                        |                       |                        |                        |                        |
|-------|--|--|------------------------|------------------------|-----------------------|------------------------|------------------------|------------------------|
| COVID |  |  | E2 = -1.238<br>(0.290) | 0.000<br>(0.151-0.555) | G2 = 0.176<br>(1.192) | 0.527<br>(0.691-2.056) | P2 = -0.819<br>(0.441) | 0.071<br>(0.181-1.071) |
|       |  |  | E3 = -0.313<br>(0.731) | 0.259<br>(0.424-1.259) |                       |                        | P3 = -0.908<br>(0.403) | 0.033<br>(0.175-0.929) |
|       |  |  |                        |                        |                       |                        | P4 = -0.364<br>(0.695) | 0.406<br>(0.295-1.638) |
|       |  |  |                        |                        |                       |                        | P5 = -0.644<br>(0.525) | 0.250<br>(0.175-1.574) |

116

117 \*E1 = other ethnics; E2 = Indian; E3 = Chinese; G1 = twining program; G2 = overseas; P1= 1<sup>st</sup> posting; P2 = 2<sup>nd</sup> posting; P3= 3<sup>rd</sup> posting; P4 = 4<sup>th</sup> posting; P5 = 5<sup>th</sup> posting

118

119

120

121

122

123

124

125

**Table 4: Association between Demographic Factors with Social/ Relationship Handling**

| Questions                                                                          | Gender            |                                     | Ethnic                 |                                     | Location of Qualification |                                     | Number of Posting      |                                     |
|------------------------------------------------------------------------------------|-------------------|-------------------------------------|------------------------|-------------------------------------|---------------------------|-------------------------------------|------------------------|-------------------------------------|
|                                                                                    | Estimates<br>(OR) | p-value<br>(Confidence<br>Interval) | Estimates<br>(OR)      | p-value<br>(Confidence<br>Interval) | Estimates<br>(OR)         | p-value<br>(Confidence<br>Interval) | Estimates<br>(OR)      | p-value<br>(Confidence<br>Interval) |
| I have less contact<br>with my friends (via<br>social media/<br>telecommunication) | 0.111<br>(1.118)  | 0.645<br>(0.696-1.795)              | E1 = 0.978<br>(2.659)  | 0.115<br>(0.789-8.965)              | G1 = 0.087<br>(1.091)     | 0.810<br>(0.539-2.208)              | P1 = 1.21<br>(3.355)   | 0.022<br>(1.191-9.447)              |
|                                                                                    |                   |                                     | E2 = 0.119<br>(1.126)  | 0.721<br>(0.587-2.162)              | G2 = 0.512<br>(1.668)     | 0.072<br>(0.956-2.912)              | P2 = 0.406<br>(1.501)  | 0.372<br>(0.616-3.657)              |
|                                                                                    |                   |                                     | E3 = 0.112<br>(1.118)  | 0.680<br>(0.659-1.898)              |                           |                                     | P3 = -0.166<br>(0.847) | 0.695<br>(0.371-1.937)              |
|                                                                                    |                   |                                     |                        |                                     |                           |                                     | P4 = 0.469<br>(1.599)  | 0.279<br>(0.684-3.736)              |
|                                                                                    |                   |                                     |                        |                                     |                           |                                     | P5 = -0.850<br>(0.428) | 0.154<br>(0.133-1.374)              |
| I have less quality<br>time spent with my<br>family members                        | -0.09<br>(0.914)  | 0.709<br>(0.571-1.464)              | E1 = 0.125<br>(1.133)  | 0.835<br>(0.349-3.682)              | G1 = -0.533<br>(0.587)    | 0.163<br>(0.278-1.241)              | P1 = 0.017<br>(1.017)  | 0.973<br>(0.377-2.743)              |
|                                                                                    |                   |                                     | E2 = -0.239<br>(0.787) | 0.467<br>(0.413-1.500)              | G2 = 0.406<br>(1.500)     | 0.131<br>(0.886-2.540)              | P2 = 0.111<br>(1.118)  | 0.810<br>(0.450-2.774)              |

|                                                                      |                   |                        |                        |                        |                        |                        |                        |                         |
|----------------------------------------------------------------------|-------------------|------------------------|------------------------|------------------------|------------------------|------------------------|------------------------|-------------------------|
|                                                                      |                   |                        | E3 = 0.523<br>(1.688)  | 0.053<br>(0.993-2.867) |                        |                        | P3 = -0.225<br>(0.799) | 0.609<br>(0.338-1.889)  |
|                                                                      |                   |                        |                        |                        |                        |                        | P4 = 0.442<br>(1.555)  | 0.325<br>(0.645-3.750)  |
|                                                                      |                   |                        |                        |                        |                        |                        | P5 = 0.193<br>(1.213)  | 0.746<br>(0.376-3.912)  |
| I always quarrel with my colleagues because of overwhelming workload | 0.225<br>(1.252)  | 0.338<br>(0.752-2.084) | E1 = -0.526<br>(0.591) | 0.456<br>(0.148-2.357) | G1 = -0.845<br>(0.430) | 0.031<br>(0.200-0.924) | P1 = 2.250<br>(9.485)  | 0.000<br>(3.111-28.918) |
|                                                                      |                   |                        | E2 = 0.282<br>(1.325)  | 0.419<br>(0.670-2.624) | G2 = 0.573<br>(1.774)  | 0.057<br>(0.982-3.204) | P2 = 1.788<br>(0.598)  | 0.000<br>(2.252-15.877) |
|                                                                      |                   |                        | E3 = -0.648<br>(0.523) | 0.026<br>(0.295-0.927) |                        |                        | P3 = 0.816<br>(2.261)  | 0.069<br>(0.937-5.457)  |
|                                                                      |                   |                        |                        |                        |                        |                        | P4 = 1.232<br>(3.427)  | 0.009<br>(1.353-8.680)  |
|                                                                      |                   |                        |                        |                        |                        |                        | P5 = 0.362<br>(1.436)  | 0.541<br>(0.450-4.581)  |
| I have a fight with my boyfriend/ girlfriend as I am busy with my    | -0.079<br>(0.924) | 0.750<br>(0.567-1.505) | E1 = 0.556<br>(1.743)  | 0.356<br>(0.536-5.666) | G1 = -0.429<br>(0.651) | 0.243<br>(0.317-1.339) | P1 = 1.000<br>(2.717)  | 0.053<br>(0.988-7.475)  |
|                                                                      |                   |                        | E2 = 0.303             | 0.359                  | G2 = -0.086            | 0.758                  | P2 = 0.807             | 0.082                   |

|                                                               |                  |                        |                        |                        |                        |                        |                        |                        |
|---------------------------------------------------------------|------------------|------------------------|------------------------|------------------------|------------------------|------------------------|------------------------|------------------------|
| work                                                          |                  |                        | (1.355)                | (0.708-2.590)          | (0.918)                | (0.532-1.583)          | (2.240)                | (0.903-5.561)          |
|                                                               |                  |                        | E3 = -0.341<br>(0.711) | 0.226<br>(0.410-1.234) |                        |                        | P3 = 0.507<br>(1.661)  | 0.238<br>(0.715-3.855) |
|                                                               |                  |                        |                        |                        |                        |                        | P4 = 0.467<br>(1.595)  | 0.287<br>(0.675-3.766) |
|                                                               |                  |                        |                        |                        |                        |                        | P5 = 0.034<br>(1.034)  | 0.952<br>(0.346-3.088) |
| I wish that we have a peer support group during this pandemic | 0.418<br>(1.519) | 0.104<br>(0.918-2.516) | E1 = -2.420<br>(0.089) | 0.000<br>(0.023-0.342) | G1 = 0.069<br>(1.071)  | 0.864<br>(0.488-2.353) | P1 = 0.143<br>(1.153)  | 0.787<br>(0.409-3.250) |
|                                                               |                  |                        | E2 = -0.291<br>(0.747) | 0.408<br>(0.375-1.489) | G2 = 0.641<br>(1.899)  | 0.027<br>(1.077-3.349) | P2 = 0.157<br>(1.170)  | 0.735<br>(0.471-2.907) |
|                                                               |                  |                        | E3 = -0.609<br>(0.544) | 0.032<br>(0.312-0.948) |                        |                        | P3 = -0.111<br>(0.895) | 0.797<br>(0.386-2.075) |
|                                                               |                  |                        |                        |                        |                        |                        | P4 = 0.296<br>(1.345)  | 0.506<br>(0.562-3.221) |
|                                                               |                  |                        |                        |                        |                        |                        | P5 = 0.626<br>(1.870)  | 0.294<br>(0.581-6.015) |
| I have a good teamwork with my                                | 0.167<br>(1.182) | 0.526<br>(0.704-1.984) | E1 = 0.850<br>(2.340)  | 0.214<br>(0.611-8.958) | G1 = -0.023<br>(0.977) | 0.955<br>(0.436-2.188) | P1 = -0.936<br>(0.392) | 0.095<br>(0.131-1.178) |



|            |  |  |                        |                        |                       |                        |                        |                        |
|------------|--|--|------------------------|------------------------|-----------------------|------------------------|------------------------|------------------------|
| colleagues |  |  | E2 = 0.148<br>(1.159)  | 0.679<br>(0.576-2.335) | G2 = 0.298<br>(1.347) | 0.312<br>(0.756-2.398) | P2 = -1.561<br>(0.210) | 0.002<br>(0.079-0.560) |
|            |  |  | E3 = -0.461<br>(0.631) | 0.121<br>(0.352-1.129) |                       |                        | P3 = -0.507<br>(0.602) | 0.264<br>(0.247-1.468) |
|            |  |  |                        |                        |                       |                        | P4 = -1.166<br>(0.312) | 0.016<br>(0.121-0.801) |
|            |  |  |                        |                        |                       |                        | P5 = -0.967<br>(0.380) | 0.122<br>(0.112-1.295) |

127

128 \*E1 = other ethnics; E2 = Indian; E3 = Chinese; G1 = twining program; G2 = overseas; P1= 1<sup>st</sup> posting; P2 = 2<sup>nd</sup> posting; P3= 3<sup>rd</sup> posting; P4 = 4<sup>th</sup> posting; P5 = 5<sup>th</sup> posting

129

130

131

132

133

134

135

## 136 **Physical Health**

137 From the analysis, majority of the medical interns feel that they have not enough rest and  
138 exercises: males do not think they have enough exercise [ $p = 0.037$ , OR = 0.599, (95% CI  
139 0.370 – 0.970)] if compared to girls; while Chinese medical interns think they do not have  
140 enough rest [ $p = 0.048$ , OR = 0.570 (95% CI 0.326 - 0.996)] Contrary, the medical interns  
141 who are graduated from twinning program think that they have enough rest and exercise. [ $p =$   
142 0.01, OR = 2.868 (95% CI 1.287 – 6.392) and  $p = 0.017$ , OR = 2.592 (95% CI 1.187 - 5.662)  
143 respectively] Viewing from the number of posting, first year junior medical interns do not  
144 think they have enough rest [ (P1)  $p = 0.014$ , OR = 0.278 (95% CI 0.100 - 0.774) / (P2)  $p =$   
145 0.032, OR = 0.352 (95% CI 0.136 - 0.912)] and they experience hunger most of the time  
146 [ (P1)  $p = 0.003$ , OR = 4.658 (95% CI 1.686 - 12.872)/ (P2)  $p = 0.004$ , OR = 3.995 (95% CI  
147 1.553 - 10.279)/ (P3)  $p = 0.012$ , OR = 3.015 (95% CI 1.278 - 7.115)] While third and fourth  
148 posting interns think they have enough exercise. [(P3)  $p = 0.004$ , OR = 3.307 (95% CI 1.459-  
149 7.494) / (P4)  $p = 0.009$ , OR = 3.117, (95% CI 1.333-7.292)]. On the other hands, they feel  
150 they are burden with heavy workload, especially the first posting [ (P1)  $p = 0.023$ , OR =  
151 3.377 (95% CI 1.182 - 9.648)/ (P4)  $p = 0.047$ , OR = 2.42 (95% CI 1.013 - 5.781)].

152

## 153 **Emotion/ Psychological Coping**

154 For the statement “If given a chance to turn back time, I would not choose to be a doctor”,  
155 majority of male do not regret becoming a doctor [ $p = 0.032$ , OR = 0.586 (95% CI 0.359-  
156 0.956)]. During this pandemic crisis, Chinese medical interns are scared to go to work [ $p =$   
157 0.030, OR = 0.546 (95% CI 0.316 - 0.944)] while Indian and other ethnics groups are worried  
158 to be infected with COVID during their works [(Indian)  $p = 0.017$ , OR = 0.217 (95% CI

159 0.062- 0.763)/ (Others)  $p = 0.000$ , OR = 0.290 (95% CI 0.151 - 0.555)] Junior medical interns  
160 are more worried and depressed than others while working during this pandemic situation:  
161 medical interns who are from second posting feel depressed [ $p = 0.043$ , OR = 2.619 (95% CI  
162 1.029- 6.668)] while third posting worried they might get infected with the virus [ $p = 0.033$ ,  
163 OR = 0.403 (95% CI 0.175 - 0.929)]. There is no association between their psychological  
164 coping and where they attained their medical degree.

165

### 166 **Social/ Relationship Handling**

167 During this pandemic period, even though there is a change in our healthcare system, most of  
168 the Chinese medical interns do not quarrel with their colleagues during work [ $p = 0.026$ , OR  
169 = 0.523 (95% CI 0.295 - 0.927)] and same goes to those who graduated from twinning  
170 program [ $p = 0.031$ , OR = 0.430 (95% CI 0.200 - 0.924)] However, based on the number of  
171 postings, most of them quarrel with their colleagues due to overwhelming workload [(P1)  $p =$   
172  $0.000$ , OR = 9.485 (95% CI 3.111 - 28.918)/ (P2)  $p = 0.000$ , OR = 0.598 (95% CI 2.252 -  
173 15.877)/ (P4)  $p = 0.009$ , OR = 3.427 (95% CI 1.353 - 8.680)]. At the same time, Chinese and  
174 other ethnics do not think there is a need of peer support group [(Chinese)  $p = 0.032$ , OR =  
175 0.544 (95% CI 0.312 - 0.948) / (Others)  $p = 0.000$ , OR = 0.089, 95% CI 0.023 - 0.342)] but  
176 those who are graduated from overseas think a peer support group will be beneficial [ $p =$   
177  $0.027$ , OR = 1.899 (95% CI 1.077-3.349)]. Medical interns in first posting think they have  
178 lesser contact with their friends during this period [ $p = 0.022$ , OR = 3.355 (95% CI 1.191 -  
179 9.447)]

180

181

## 182 **Discussion**

183 In general, HO are medical interns who require at least two years of medical training before  
184 they are allowed to practice medicine in Malaysia.[6] Being part of the training is stressful as  
185 they must go through different fields and learn to manage patients in respective fields within  
186 limited time. Furthermore, they have pressures from superiors, expectation from patients and  
187 requirements to be fulfilled by performing numbers of basic procedures within that short  
188 period of time. [6, 12-14]

189 COVID-19 pandemic has affected all HCW greatly in terms of routine ward rounds, elective  
190 operations and clinic arrangement, thus disrupts our current healthcare system. [15, 16]  
191 Additionally, they are suffered from immense stresses as they are worried of contacting the  
192 virus while treating patients. [11, 17] In addition, educational training and medical teaching  
193 session have been ceased until further notice. They have inadequate cases and procedures to  
194 observe; facing lack of experience and hands-on clinical skills; being re-allocated depending  
195 on capacity and workload of the hospital.[8, 9] Due to the tremendous uncertainty during this  
196 pandemic crisis, medical interns as the junior most doctors face far more stresses than other  
197 HCW.

## 198 **Physical Health**

199 Many medical interns feel like they do not have enough rest, food and exercise. This result  
200 shows that they are busy and occupied with work until they could not have adequate rest or  
201 even meals. On the other hands, the reason they lack exercises could be due to busy work life  
202 during the day which exhaust them physically or due to COVID pandemic where recreational  
203 activities and gyms are forbidden. In addition, they are burdened with heavy workload while  
204 working during this pandemic period. Among medical interns, they are divided into small

205 groups while attending patients to minimise close contact. This strategy aims to prevent cross  
206 transmission between HCW but unfortunately reduces the numbers of attending doctors per  
207 shift thus lead to relatively high workload. Expectedly, first posting of medical interns are  
208 affected the most as they are new to their jobs. As a fresh graduate who just entered a new  
209 working environment, not only they need to manage patients and perform ward works but  
210 they require extra effort to equipped themselves to deal with pandemic. This pandemic crisis  
211 causes a surge of patients' loads which might exceed their capabilities thus encumber them  
212 further.

213 However, medical student who are graduated from twining program (both local and overseas  
214 universities and colleges) beg for differ where they feel that they have enough rest and  
215 exercises during this period. By attending universities from two different countries and two  
216 different cultures might allow the medical interns to adapt to new environment more easily  
217 and readily if compared with others.

### 218 **Emotion/ Psychological Coping**

219 Majority of the medical interns are worried of contacting COVID-19 while working in a  
220 COVID centre. Some of them are in fear and even depressed to head to work during this  
221 pandemic situation. The results are expected as many literatures have showed that the  
222 psychological impacts of pandemic towards HCW are significant.[2, 8, 10, 17-21] During this  
223 pandemic season, HCW experiences a complex emotion such as fear, worry, anxiety and  
224 even depression. To work under such circumstances, mental health of HCW will be affected  
225 inevitably. For a HCW to fight against a virus with no cure at the moment and to deal with  
226 pressures from patients and communities, unimaginable stress could be exerted to them.  
227 Besides, fear of local transmission within HCW and worry of transmitting the virus to their  
228 families heighten their tensions inevitably. This could be the aftermath effect of pandemic

229 crisis which can eventually lead to acute psychological distress, burnout, and posttraumatic  
230 stress.[22]

231 Interestingly, most males do not regret of being a doctor. [23, 24] This could be due to our  
232 cultural influence that male should always be firm and decisive to carry out their  
233 responsibilities with their strong will.

#### 234 **Social/ Relationship Handling**

235 Since medical interns spend most of their time working, relationships with colleagues are  
236 unavoidably affected during this period. Most of the junior medical interns' have conflicts  
237 with their colleagues during this period due to overwhelming workload. This manifestation  
238 could be one of the signs that medical interns are under work stress. [10] They could be  
239 overworked and fatigue which lead to miscommunication and misunderstanding. Without  
240 trust, spirit of teamwork and harmony could not be established and lead to unhappiness and  
241 dissatisfaction in workplace.

242 On the other hand, some feel like that they have lesser contact with their friends during this  
243 period even with the use of telecommunication devices. Possibility that they are occupied  
244 with their heavy workload and do not have time to socialise. This will indirectly cultivate  
245 antisocial and indifference behaviours among medical interns.

246 As for peer support group, it seems to be beneficial for most of the interns who graduated  
247 from overseas but Chinese and other ethnics choose to differ. For international medical  
248 students to adapt and survive overseas, peer support and social support are commonly  
249 introduced. Peer support plays an important role in holding them together to overcome this  
250 difficult time and lessen their tensions by sharing their thoughts with others.

251

252 **Limitation**

253 1) This is a pilot study where the questionnaire is not validated. The questionnaire is  
254 created based on problems encountered by medical interns during their daily routines.

255 2) As for the sample size, only 236 medical interns participate in this study with the  
256 initial calculated sample size of 378. This contributes to 63% of response rate. [25, 26] There  
257 are few problems identified which are some of the medical interns have finished their  
258 internship and had switched to other hospitals or awaiting placement; some of them are in the  
259 transition of switching departments; invalid email addresses; possibility of busy working  
260 schedules or being too preoccupied with their routine works.

261 3) In addition, this is a self-administered questionnaire in anonymity where repetition of  
262 entry is possible. Follow-up study could be helpful in assessing the progression of medical  
263 interns after COVID-19 pandemic subsides.

264

265 **Conclusion**

266 COVID-19 pandemic has invaded many countries and paralysed most of the  
267 healthcare systems. During this challenging period, medical interns who are the junior most  
268 doctors suffered significantly especially their physical health, emotion states and social lives.

269 To ensure physical needs of medical interns are fulfilled, a sufficient protected time  
270 should be given to them, such as time for break and meals in between their works without  
271 neglecting their duties. During pandemic period where movement restriction order is  
272 enforced, restaurants and food suppliers are forbidden to open at night; to provide meals  
273 during their oncall or night shifts might solve their problems. Without proper rest and energy,  
274 not only their health but patients' safety will be jeopardised.

275 Psychological impact of the pandemic on HCW is well reported in many literatures,  
276 similar results show in medical interns too. The cause of it mainly due to insecurity which  
277 most of the HCW feel when facing pandemic situation: lack of latest medical information  
278 regarding COVID-19 and insufficient medical resources and personal protective equipment  
279 (PPE) while treating patients. To complicate the situation, lack of psychological support  
280 amongst medical interns often drift them away when they are at the edge of breakdown. [10,  
281 20] Early detection of mental instability warrants an early referral to psychiatrists or  
282 counsellors. Implementation of counselling services and peer support groups should be  
283 established to overcome mental health issues which are encountered by medical interns.[27,  
284 28] With the aid of these measures, working relationships with colleagues shall be improved  
285 and unnecessary conflicts could be avoided.

286 In a nutshell, the impact of COVID-19 amongst medical interns is significant and  
287 should be addressed appropriately. Their overall well-being should be protected and  
288 preserved without jeopardise their training and preparation for pandemic crisis in the future.

289

290

291

292

293

294

295

296



297 **Acknowledgement**

298 I sincerely would like to thank everyone who has contributed to this study. A heartfelt  
299 gratitude to all parties in helping to make this study a success:

300 1) House Officer Coordinators from different departments in UMMC

301 2) Human Resource Officers UMMC

302 3) Dr Retnagowri A/P Rajadram, Senior Lecturer, Research Unit, Department of Surgery,  
303 UMMC, Malaysia

304 4) Professor Dr April Roslani, Head of Department of Surgery, UMMC, Malaysia

305 5) Professor Dr. Tunku Kamarul Zaman Bin Tunku Zainol Abidin, Director of UMMC,  
306 Malaysia

307

308

309

310

311

312

313

314

315

316 **Reference**

- 317 1. WHO. *Rolling updates on coronavirus disease (COVID-19)*. WHO 2020.
- 318 2. Wu, Z. and J.M. McGoogan, *Characteristics of and Important Lessons From the Coronavirus*  
319 *Disease 2019 (COVID-19) Outbreak in China: Summary of a Report of 72314 Cases From the*  
320 *Chinese Center for Disease Control and Prevention*. JAMA, 2020.
- 321 3. Ranney, M.L., V. Griffeth, and A.K. Jha, *Critical Supply Shortages - The Need for Ventilators*  
322 *and Personal Protective Equipment during the Covid-19 Pandemic*. N Engl J Med, 2020.  
323 **382**(18): p. e41.
- 324 4. Emanuel, E.J., et al., *Fair Allocation of Scarce Medical Resources in the Time of Covid-19*. N  
325 Engl J Med, 2020. **382**(21): p. 2049-2055.
- 326 5. Tang, K.H.D., *Movement control as an effective measure against Covid-19 spread in Malaysia:*  
327 *an overview*. Journal of Public Health, 2020.
- 328 6. Ministry of Health, M., *Housemanship*. 2016.
- 329 7. Ministry of Health, M., *Covid-19: 1,000 housemen to be stationed nationwide to support*  
330 *medical staff*. The Star, Saturday, 14 Mar 2020.
- 331 8. Tay, K., et al., *COVID-19 in Singapore and Malaysia: Rising to the Challenges of Orthopaedic*  
332 *Practice in an Evolving Pandemic*. Malays Orthop J, 2020. **14**(2).
- 333 9. Liang, Z.C., S.B.S. Ooi, and W. Wang, *Pandemics and Their Impact on Medical Training:*  
334 *Lessons From Singapore*. Acad Med, 2020.
- 335 10. Zhang, W.R., et al., *Mental Health and Psychosocial Problems of Medical Health Workers*  
336 *during the COVID-19 Epidemic in China*. Psychother Psychosom, 2020: p. 1-9.
- 337 11. Qian Liu, D.L., Joan E Haase, Qiaohong Guo, Xiao Qin Wang, Shuo Liu, Lin Xia, Zhongchun Liu,  
338 Jiong Yang, Bing Xiang Yang, *The experiences of health-care providers during the COVID-19*  
339 *crisis in China: a qualitative study*. Lancet Glob Health 2020, 2020. **8**: p. e790–98.

- 340 12. Gopalakrishnan, U., Affan, Zamri, Kamal, Sandheep *Stress perceived by houseman in a*  
341 *hospital in northern Malaysia*. The Medical Journal of Malaysia, 2016. **71(1):8-11**(71(1):8-11).
- 342 13. Al-Dubai, S.A., et al., *Emotional burnout, perceived sources of job stress, professional*  
343 *fulfillment, and engagement among medical residents in Malaysia*. ScientificWorldJournal,  
344 2013. **2013**: p. 137620.
- 345 14. Tyssen, R., et al., *The impact of job stress and working conditions on mental health problems*  
346 *among junior house officers. A nationwide Norwegian prospective cohort study*. Med Educ,  
347 2000. **34(5)**: p. 374-84.
- 348 15. Gupta, S. and D.G. Federman, *Hospital preparedness for COVID-19 pandemic: experience*  
349 *from department of medicine at Veterans Affairs Connecticut Healthcare System*. Postgrad  
350 Med, 2020: p. 1-6.
- 351 16. Al-Jabir, A., et al., *Impact of the Coronavirus (COVID-19) pandemic on surgical practice - Part*  
352 *1 (Review Article)*. Int J Surg, 2020.
- 353 17. Tan, B.Y.Q., et al., *Psychological Impact of the COVID-19 Pandemic on Health Care Workers in*  
354 *Singapore*. Ann Intern Med, 2020.
- 355 18. Wong, J.E.L., Y.S. Leo, and C.C. Tan, *COVID-19 in Singapore-Current Experience: Critical*  
356 *Global Issues That Require Attention and Action*. JAMA, 2020.
- 357 19. Liu, S., et al., *Online mental health services in China during the COVID-19 outbreak*. Lancet  
358 Psychiatry, 2020. **7(4)**: p. e17-e18.
- 359 20. Lai, J., et al., *Factors Associated With Mental Health Outcomes Among Health Care Workers*  
360 *Exposed to Coronavirus Disease 2019*. JAMA Netw Open, 2020. **3(3)**: p. e203976.
- 361 21. Li, S., et al., *The Impact of COVID-19 Epidemic Declaration on Psychological Consequences: A*  
362 *Study on Active Weibo Users*. Int J Environ Res Public Health, 2020. **17(6)**.
- 363 22. Maunder, R.G., et al., *Long-term psychological and occupational effects of providing hospital*  
364 *healthcare during SARS outbreak*. Emerg Infect Dis, 2006. **12(12)**: p. 1924-32.

- 365 23. Aoyagi, Y., et al., *Healthcare workers' willingness to work during an influenza pandemic: a*  
366 *systematic review and meta-analysis*. *Influenza Other Respir Viruses*, 2015. **9**(3): p. 120-30.
- 367 24. Wicker, S., H.F. Rabenau, and R. Gottschalk, [*Influenza pandemic: Would healthcare workers*  
368 *come to work? An analysis of the ability and willingness to report to duty*].  
369 *Bundesgesundheitsblatt Gesundheitsforschung Gesundheitsschutz*, 2009. **52**(8): p. 862-9.
- 370 25. Lisa R. Carley-Baxter, C.A.H., David J. Roe, Susan E. Twiddy, Rodney K. Baxter and Jill  
371 Ruppenkamp, *Does Response Rate Matter? Journal Editors Use of Survey Quality Measures*  
372 *in Manuscript Publication Decisions*. *Survey Practice*, 2009. **Vol. 2, no 7, 2009**.
- 373 26. Fincham, J.E., *Response rates and responsiveness for surveys, standards, and the Journal*. *Am*  
374 *J Pharm Educ*, 2008. **72**(2): p. 43.
- 375 27. Wu, A.W., C. Connors, and G.S. Everly, Jr., *COVID-19: Peer Support and Crisis Communication*  
376 *Strategies to Promote Institutional Resilience*. *Ann Intern Med*, 2020. **172**(12): p. 822-823.
- 377 28. Cheng, P., et al., *COVID-19 Epidemic Peer Support and Crisis Intervention Via Social Media*.  
378 *Community Ment Health J*, 2020. **56**(5): p. 786-792.
- 379
